# Supplementary material
Source: PubMed Central journal article supplement (PMC4390637)
Supplement: JCM.02648-14_zjm999094090so1.pdf [file JCM.02648-14_zjm999094090so1.pdf]

**DENV 3'UTR Consensus**

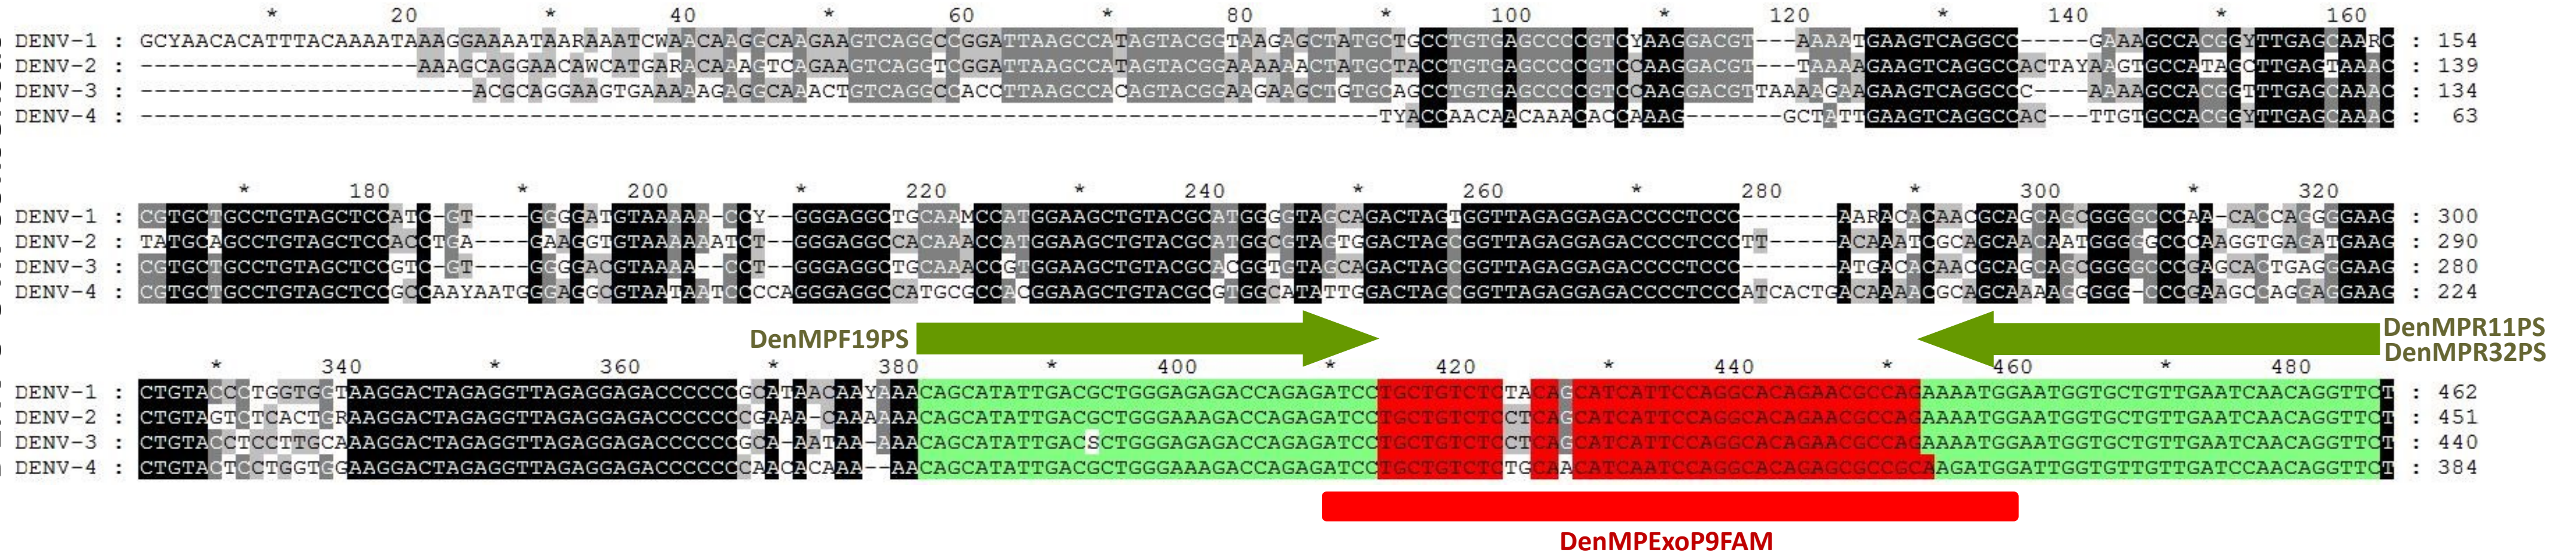

FIG S1. Map of RT-RPA primers and exo-probe in alignment with the DENV 3'UTR consensus sequences. The arrows indicate the orientation of primers in 5' to 3' direction.
