# Supplementary material
Source: PubMed Central journal article supplement (PMC4390637)
Supplement: JCM.02648-14_zjm999094090so2.pdf [file JCM.02648-14_zjm999094090so2.pdf]

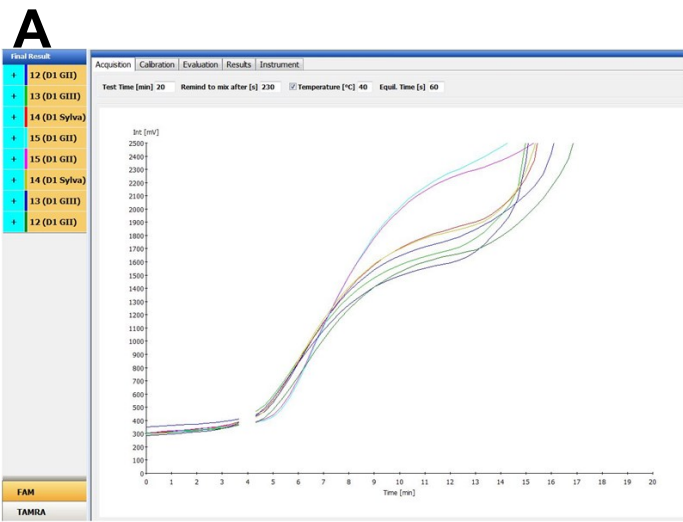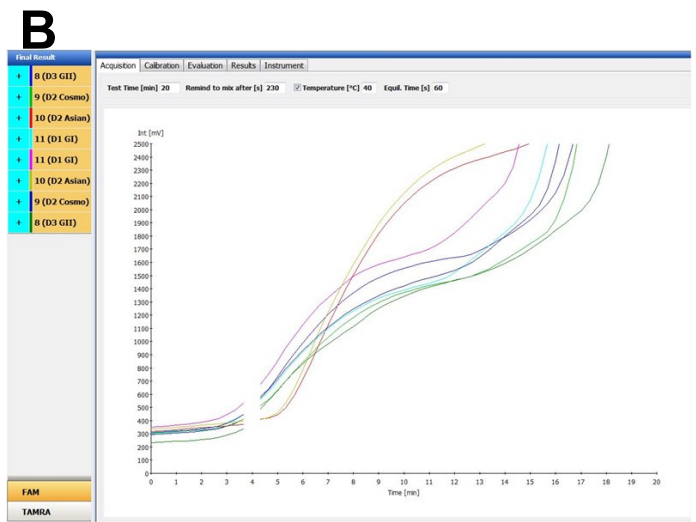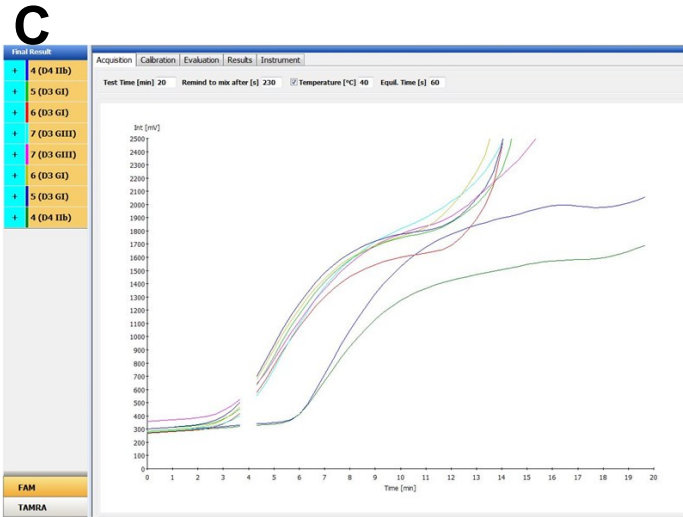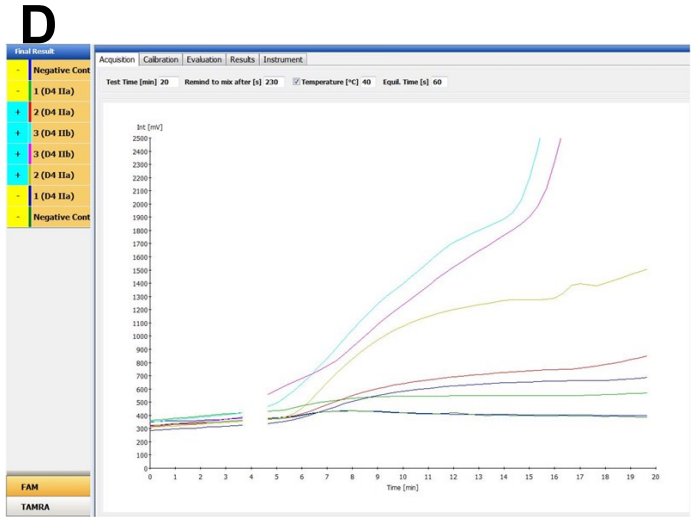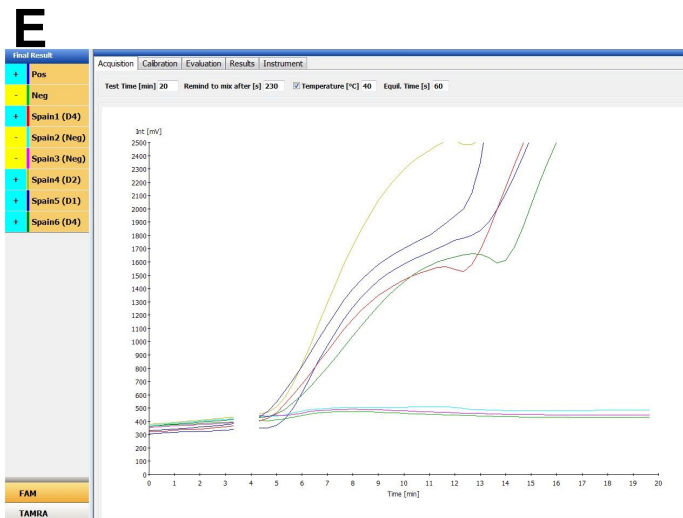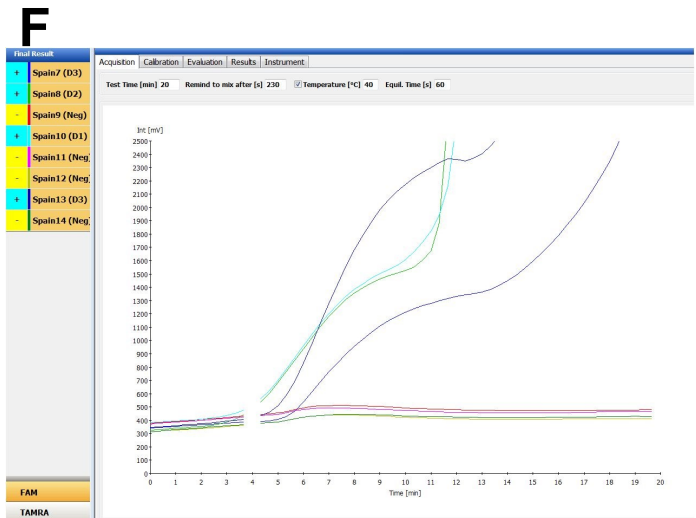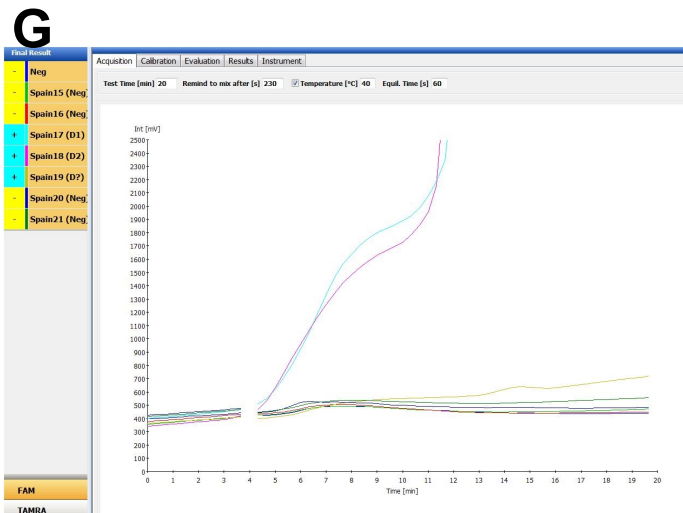

**FIG S2. RT-RPA amplification curves of the reference DENV strains obtained in Malaysia (A-D) and Spain (E-G).**
