# Supplementary material
Source: PubMed Central journal article supplement (PMC4390637)
Supplement: JCM.02648-14_zjm999094090so3.pdf [file JCM.02648-14_zjm999094090so3.pdf]

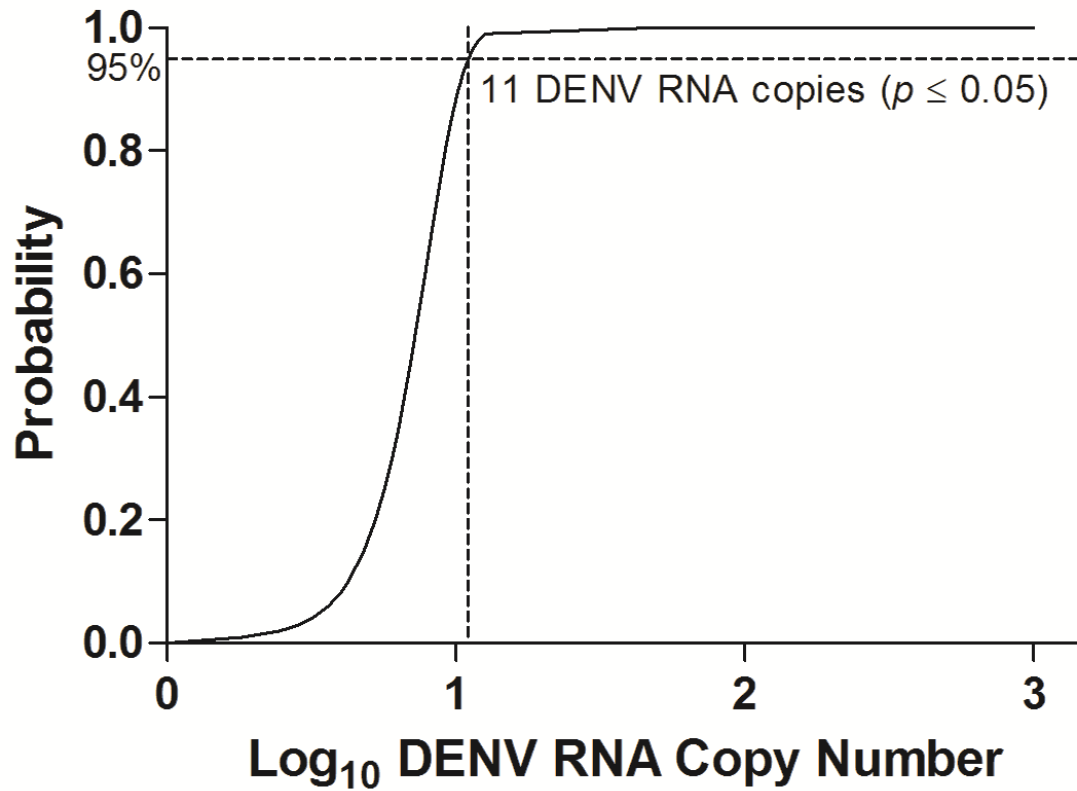

**FIG S3. Detection limit of the DENV RT-RPA assay.** The probit regression curve was obtained from eight replicates of DENV RNA in four dilutions (1000, 100, 50, and 10 copy numbers).
