# Supplementary material
Source: PubMed Central journal article supplement (PMC4390637)
Supplement: JCM.02648-14_zjm999094090so4.pdf [file JCM.02648-14_zjm999094090so4.pdf]

**A**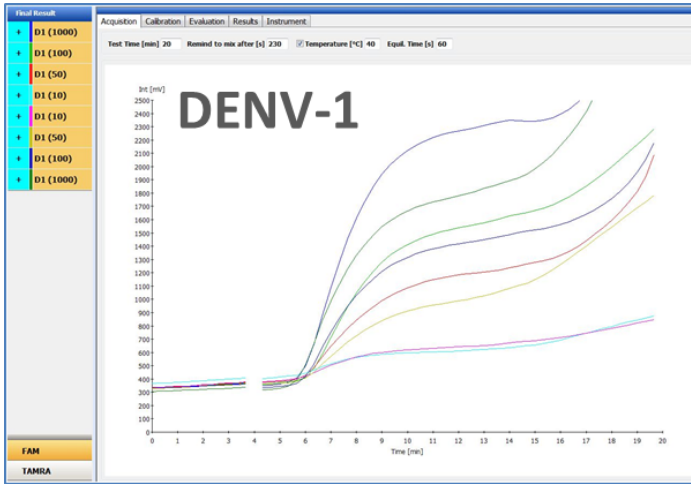**B**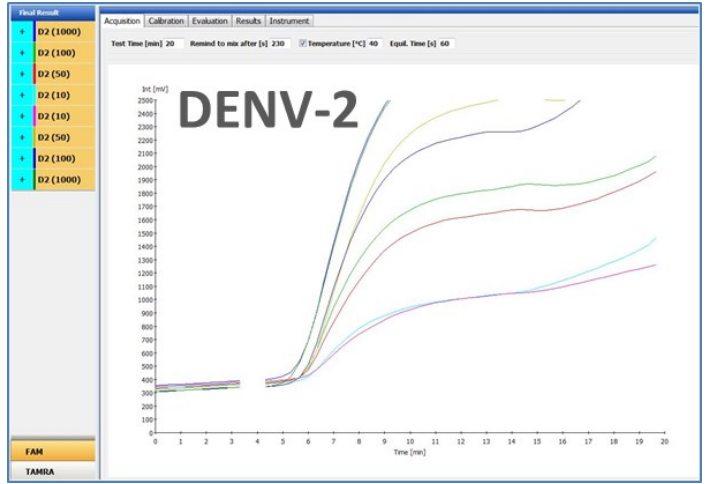**C**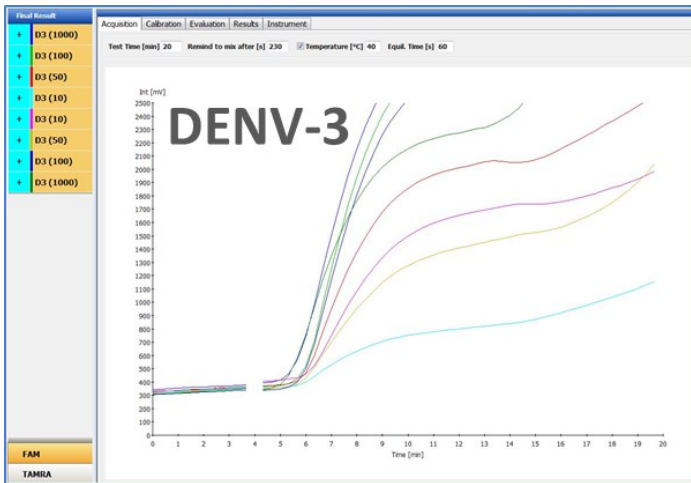**D**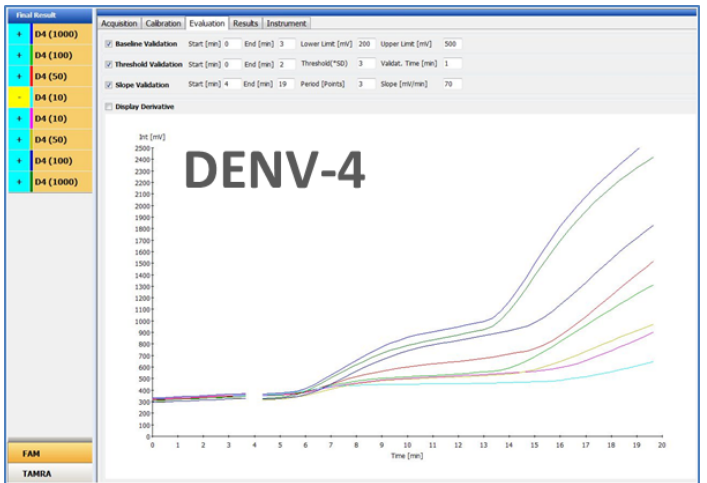**E**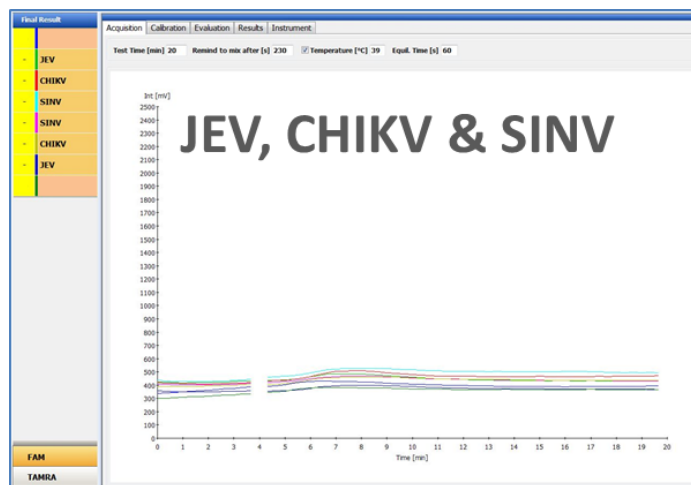

**FIG S4.** RT-RPA amplification curves of all four DENV serotypes at different dilutions (1000, 100, 50, and 10 RNA copies) (A-D) and other arboviruses (JEV, CHIKV and SINV) (E).
