# Supplementary material
Source: PubMed Central journal article supplement (PMC4390637)
Supplement: JCM.02648-14_zjm999094090so5.pdf [file JCM.02648-14_zjm999094090so5.pdf]

TABLE S1. List of dengue viruses obtained from Spain

| Isolate ID | Serotype | Genotype                | Origin         | Reference |
|------------|----------|-------------------------|----------------|-----------|
| 1          | DENV-4   | II                      | Brazil         | -         |
| 4          | DENV-2   | American/Asian          | Paraguay       | -         |
| 5          | DENV-1   | III or American/African | Venezuela      | -         |
| 6          | DENV-4   | II                      | Brazil         | -         |
| 7          | DENV-3   | III                     | Thailand       | -         |
| 8          | DENV-2   | Cosmopolitan            | Pakistan       | -         |
| 10         | DENV-1   | III or American/African | India          | (1)       |
| 13         | DENV-3   | III                     | South American | -         |
| 17         | DENV-1   | III or American/African | Venezuela      | -         |
| 18         | DENV-2   | African Sylvatic        | Senegal        | (2)       |
| 19         | DENV-3   | I                       | Philippines    | -         |

#### REFERENCES

1. **Kurolt IC, Betica-Radic L, Dakovic-Rode O, Franco L, Zelena H, Tenorio A, Markotic A.** 2013. Molecular characterization of dengue virus 1 from autochthonous dengue fever cases in Croatia. *Clin. Microbiol. Infect.* **19**:E163-165.
2. **Franco L, Palacios G, Martinez JA, Vazquez A, Savji N, De Ory F, Sanchez-Seco MP, Martin D, Lipkin WI, Tenorio A.** 2011. First report of sylvatic DENV-2-associated dengue hemorrhagic fever in West Africa. *PLoS Negl. Trop. Dis.* **5**:e1251.
