# Supplementary material
Source: PubMed Central journal article supplement (PMC4390637)
Supplement: JCM.02648-14_zjm999094090so6.pdf [file JCM.02648-14_zjm999094090so6.pdf]

TABLE S2. Detection limit of the DENV RT-RPA assay

| DENV RNA copy number | Number of positive replicates/total replicates tested (%) |
|----------------------|-----------------------------------------------------------|
| 1000                 | 8/8 (100.0)                                               |
| 100                  | 8/8 (100.0)                                               |
| 50                   | 8/8 (100.0)                                               |
| 10 <sup>a</sup>      | 7/8 (87.5)                                                |

<sup>a</sup> Misdetection in one of the replicates of DENV-4.
